1 Word count: 4545  
2 Abstract word count: 221  
3 Key words: 5  
4 Number of references: 48  
5 Number of tables: 05  
6 Number of figures: 00  
7

8 **Factors associated with suffering domestic violence in women during the last**  
9 **semester of the pandemic in Honduras- Central America**

10

11 Eleonora Espinoza-Turcios<sup>1,2</sup>

12 Lysien Ivania Zambrano<sup>1</sup>

13 Carlos Sosa-Mendoza<sup>2,3</sup>

14 Henry Noel Castro Ramos<sup>1</sup>

15 Dennis Arias-Chávez<sup>4</sup>

16 Christian R. Mejia<sup>5</sup>

17

18 **Affiliations:**

19 <sup>1</sup> Institute for Research in Medical Sciences and Right to Health (ICIMEDES)/ Faculty  
20 of Medical Sciences (FCM), National Autonomous University of Honduras (UNAH).  
21 Tegucigalpa, Honduras.

22 <sup>2</sup>Mental health research group, FCM-UNAH

23 <sup>3</sup>Honduran Institute for the Prevention of Alcoholism, Drug Addiction and Drug  
24 Dependence (IHADFA) Tegucigalpa, Honduras.

25 <sup>4</sup>Universidad Continental, Arequipa, Perú

26

27 <sup>5</sup>Translational Medicine Research Centre. Universidad Norbert Wiener. Lima, Perú.

28

29 **Corresponding authors:** Eleonora Espinoza Turcios [eleonora.espinoza@unah.edu.hn](mailto:eleonora.espinoza@unah.edu.hn),  
30 Instituto de Investigación en Ciencias Médicas y Derecho a la Salud  
31 (ICIMEDES)/Unidad de Investigación Científica (UIC), Edificio CM1, FCM, Calle La

32 Salud, contiguo al Hospital Escuela, Tegucigalpa, M. D.C., Honduras, C.A. Código  
33 Postal: 11101.

## 34 **ABSTRACT**

35 **Introduction:** Mental health deterioration had already been reported prior to the  
36 pandemic, resulting in domestic violence in women, but this has not yet been reported  
37 in the pandemic in Central America. **AIM:** To determine the Factors associated with  
38 suffering domestic violence in women in the last half year of the pandemic in Honduras.  
39 **Methodology:** Analytical and retrospective cross-sectional study, carried out through a  
40 survey in 17 departments of Honduras, in hospitals and first level health care centers.  
41 The main variable was obtained through the question "if you suffered domestic violence  
42 in the last 6 months", being the possible answer verbal, physical, psychological.  
43 Descriptive and analytical results were obtained. **Results:** Of the 8442 Hondurans  
44 surveyed, 4.2% (352) perceived verbal violence, 1.9% (165) physical violence and 1.3%  
45 (113) psychological violence. In the multivariate analysis, it was found that women  
46 ( $p=0.001$ ), those with a history of alcohol ( $p=0.002$ ) or drug use ( $p=0.015$ ), previous  
47 mental illness ( $p<0.001$ ), mild ( $p<0.001$ ), moderate ( $p<0.001$ ) or severe ( $p=0.025$ )  
48 depression ( $p<0.001$ ) had experienced more domestic violence; On the contrary, there  
49 was less perception of domestic violence at higher economic income (all p-values were  
50  $<0.029$ ), among single ( $p=0.003$ ) and married people ( $p<0.001$ ). **Discussion:** Important  
51 Factors associated with suffering domestic violence in women, especially social factors  
52 and a history of mental illness, as well as alcohol and drug use in the home.

53 **Key words:** COVID-19, Honduras, Central America, Women, Domestic Violence.

54

## 55 **INTRODUCTION**

56 Domestic violence (DV) is defined as "a pattern of behavior that is used to gain  
57 or maintain power and control over an intimate partner in a relationship, may include a  
58 child or other relative, or any other member of the household" [1]. Globally, the lifetime  
59 prevalence of intimate partner violence is 26% among married or intimate partner  
60 women over the age of 15; estimating that 6% of women over the age of 15 have been  
61 subjected to non-partner sexual violence during some point in their lifetime [2].

62 At the beginning of the COVID-19 pandemic, in the first months of 2020,  
63 domestic violence increased worldwide, Spain recorded a 20% increase in calls to  
64 women's helplines; [3]. United Kingdom reported an additional 25% one week after the  
65 announcement of the social distancing measures; [4] in France the increase of 36% was  
66 reported; [5] in Jingzhou-China the number of reported domestic violence cases was  
67 three times higher in February 2020, this compared to the same period last year [6]. This  
68 is in addition to the global and public health problems that were known prior to this  
69 pandemic that was generated worldwide, where one in three women had suffered in her  
70 life some type of physical and/or sexual violence by an intimate partner [7].

71 In Honduras, the problem of domestic violence behaves similarly to the rest of  
72 the world, and worsened as a result of the COVID-19 pandemic. According to data from  
73 the National Demographic and Health Survey (ENDESA /MICS 2019), 20% of  
74 Honduran women aged 15-49 years have ever been beaten or physically abused by  
75 someone after the age of 15, psychological violence occurs more frequently in urban  
76 areas (with 17% compared to 12% of cases in rural areas) and 4% of women aged 15-49  
77 have suffered sexual abuse since the age of 12, being in 12.5% of cases produced by the  
78 current boyfriend/ex-boyfriend [8]. And as if this were not enough, according to the  
79 University Institute for Democracy, Peace and Security UNAH, there were 636 and 330  
80 deaths of women due to violence in 2013 and 2021, respectively. And from January to  
81 October 2022 there were 252 violent deaths of women and/or femicide, that is, every 28  
82 hours and 57 minutes a woman dies in Honduras [9]. The domestic violence women in  
83 Honduras involves multiple factors, such as socioeconomic, cultural, religious, and  
84 represents a serious social problem with serious consequences [10]. Study conducted by  
85 the National Autonomous University of Honduras through the Faculty of Medical  
86 Sciences ICIMEDES, that women suffer some type of violence 45% in five very low-  
87 income communities [11], also the national survey of the country ENDESA in 2019  
88 shows that women between 15-49 years have suffered 16% some type of violence [8].  
89 For all these reasons, the objective was to determine the Factors associated with  
90 suffering domestic violence in women in the last half year of the pandemic in Honduras.

91

## 92 **METHODOLOGY**

93 An analytical, cross-sectional and retrospective research was generated. It was  
94 based on the information collected during the pandemic stage, which included the last  
95 third of the year 2021 and the first third of 2022. For the collection of information, a  
96 baseline instrument was elaborated, which measured the baseline mental health situation  
97 of the Honduran population in 17 of the departments [12]. This was carried out in health  
98 care centers, both hospitals and first level health care facilities.

99 In order for a respondent to participate in the research, it was taken into account  
100 that he/she was 18 years of age or older, that he/she agreed to participate in the research  
101 and that he/she had answered the main question, ("if you suffered domestic violence in  
102 the last 6 months", being the possible answer verbal, physical, psychological). There  
103 were no exclusions because all respondents had answered the main question and met the  
104 other inclusion criteria. To determine whether the number of respondents was adequate  
105 for the main crosstabs, statistical power was calculated, where there was adequate  
106 power for the crosstabs of general perception of violence versus sex (power = 100%),  
107 according to the amount of family income (power = 100% for all categories), marital  
108 status (power = 100% for all categories), alcohol consumption in the last 6 months  
109 (power = 98%), drug consumption in the last 6 months (power = 100%), history of  
110 mental illness (power = 100%) and versus depression (power = 100% for all categories).

111           The main variable was obtained through the question "if you have suffered  
112 domestic violence in the last 6 months", which was a semi-open question with one of  
113 four possible alternatives: no violence, or verbal, physical, psychological violence. For  
114 the individual analysis of each of the types of violence, they were crossed with each of  
115 the independent variables. But for the final analysis, the perception of violence was  
116 considered if one or more of the three categories (verbal, physical or psychological) was  
117 perceived, which was also crossed against the other variables. Secondary variables were  
118 age (in years completed), sex (male or female), amount of family income (<\$400, \$400-  
119 800, \$801-1199, \$1200-1600 and >\$1600), marital status (common-law/cohabiting,  
120 single, married or widowed/divorced), alcohol use in the past 6 months (no or yes), drug  
121 use in the past 6 months (no or yes), history of mental illness (no or yes) and versus  
122 depression (have not, mild, moderate, severe or very severe).

123           To proceed with the data analysis, the information was first extracted from the  
124 database, where an author did the general filtering of the data to be analyzed. Then a  
125 second quality control was carried out by another of the authors, where the variables  
126 were categorized, labeled and a glossary was constructed. Then all this information was  
127 passed to the statistical program Stata (license obtained by the authors who carried out  
128 the analysis). Then a table was created showing the frequencies and percentages of the  
129 suffering of the three types of domestic violence, then three tables were generated  
130 where these types of violence were crossed according to the socio-pathological  
131 variables, where the p-values were obtained with the Wilcoxon test (for the age  
132 variable) and the chi-square (for the other variables). Then a final table was generated,  
133 where the dependent variable was having suffered at least one type of violence, also  
134 being crossed against the socio-pathological variables; in this step the prevalence ratios,  
135 95% confidence intervals and p-values were obtained, this with the use of generalized  
136 linear models: Poisson family, log link function and adjusted models for obtaining  
137 robust variances). The p-value <0.05 was the criterion for a variable to pass from the  
138 bivariate to the multivariate model, as well as to determine statistical significance.

139           Ethics were always respected, the initial study was approved by a local ethics  
140 committee (2019-62), The survey was anonymous, and participants were informed of  
141 the objective of the study.

142

143 **RESULTS**

144 Of the 8442 Hondurans surveyed, 4.2% (352) perceived verbal violence, 1.9%  
145 (165) perceived physical violence and 1.3% (113) perceived psychological violence.  
146 When the 3 types of perceptions were added together, 97.9% (8265) did not perceive  
147 any violence, while 0.1% of respondents perceived all 3 types of violence in their  
148 homes during the last six months. Table 1

149

150 **Table 1. Frequencies and percentages of experiencing domestic violence in women**  
151 **during the last semester of the pandemic in Honduras, n=8442.**

| Type of violence              | Frequency | Percentage |
|-------------------------------|-----------|------------|
| <b>Verbal abuse</b>           |           |            |
| No                            | 8090      | 95.8       |
| Yes                           | 352       | 4.2        |
| <b>Physical violence*</b>     |           |            |
| No                            | 8277      | 98.1       |
| Yes                           | 165       | 1.9        |
| <b>Psychological violence</b> |           |            |
| No                            | 8329      | 98.7       |
| Yes                           | 113       | 1.3        |
| <b>Sum of perceptions</b>     |           |            |
| No violence of any kind       | 8265      | 97.9       |
| 1 type of violence            | 126       | 1.5        |
| 2 type of violence            | 45        | 0.5        |
| 3 type of violence            | 6         | 0.1        |

152 \*don't include violence sexual.

153 Verbal domestic violence was associated with gender ( $p=0.009$ ), family income  
154 ( $p<0.001$ ), marital status ( $p=0.013$ ), alcohol consumption at home ( $p<0.001$ ) or drug use  
155 ( $p<0.001$ ), a history of mental illness ( $p<0.001$ ) and depression ( $p<0.001$ ). Table 2

156

157

158 **Table 2. Household verbal abuse associated with socio-pathological variables in the last**  
 159 **half year of the pandemic in Honduras, n=8442.**

| Variables                           | Verbal abuse |            | P value |
|-------------------------------------|--------------|------------|---------|
|                                     | No n (%)     | Yes n (%)  |         |
| <b>Age*</b>                         | 35(26-49)    | 35 (26-48) | 0.740   |
| <b>Gender</b>                       |              |            |         |
| Male                                | 2915 (96.6)  | 103 (3.4)  | 0.009   |
| Female                              | 5175 (95.4)  | 249 (4.6)  |         |
| <b>Family income (monthly)</b>      |              |            |         |
| <400.00 (\$)                        | 2709 (94.6)  | 154 (5.4)  | <0.001  |
| 400.00-800.00 (\$)                  | 2134 (95.9)  | 92 (4.1)   |         |
| 801.00-1199.00 (\$)                 | 999 (97.2)   | 29 (2.8)   |         |
| 1200.00-1600.00 (\$)                | 446 (97.6)   | 11(2.4)    |         |
| >1600.00 (\$)                       | 570 (97.4)   | 15 (2.6)   |         |
| <b>Marital status</b>               |              |            |         |
| Unmarried/cohabitating partner      | 2821 (94.9)  | 151 (5.1)  | 0.013   |
| Singles                             | 2635 (96.2)  | 105 (3.8)  |         |
| Married                             | 2269 (96.6)  | 79 (3.4)   |         |
| Widowed or divorced                 | 365 (95.6)   | 17 (4.4)   |         |
| <b>Consumption of alcohol**</b>     |              |            |         |
| No                                  | 5894 (96.5)  | 212 (3.5)  | <0.001  |
| Yes                                 | 2196 (94.0)  | 140 (6.0)  |         |
| <b>Consumption of drugs**</b>       |              |            |         |
| No                                  | 7906 (96.1)  | 322 (3.9)  | <0.001  |
| Yes                                 | 184 (86.0)   | 30(14.0)   |         |
| <b>Antecedent of mental illness</b> |              |            |         |
| No                                  | 7547 (96.2)  | 298 (3.8)  | <0.001  |
| Yes                                 | 543 (91.0)   | 54 (9.0)   |         |
| <b>Depression***</b>                |              |            |         |
| None                                | 5972 (97.2)  | 174 (2.8)  | <0.001  |

|               |             |           |
|---------------|-------------|-----------|
| Mild          | 1668 (92.5) | 136 (7.5) |
| Moderate      | 310 (91.7)  | 28 (8.3)  |
| Severe        | 87 (89.7)   | 10 (10.3) |
| Highly severe | 53 (93.0)   | 4 (7.0)   |

160 \*Quantitative variable (median and interquartile ranges are shown). \*\*Household  
 161 consumption in the last six months. \*\*\*Measured with Hamilton's test. P values were  
 162 obtained with Wilcoxon test (age) and chi-square.

163 Associated with physical violence at home were home use of alcohol (p=0.004) or drugs  
 164 (p<0.001), history of mental illness (p<0.001) and depression (p<0.001). Table 3

165

166 **Table 3. Physical violence at home associated with socio-pathological variables in the last**  
 167 **half year of the pandemic in Honduras, n=8442.**

| Variables                       | Physical violence |            | P value |
|---------------------------------|-------------------|------------|---------|
|                                 | No n (%)          | Yes n (%)  |         |
| <b>Age*</b>                     | 35 (26-49)        | 36 (27-46) | 0.741   |
| <b>Gender</b>                   |                   |            |         |
| Male                            | 2968 (98.3)       | 50 (1.7)   | 0.140   |
| Female                          | 5309 (97.9)       | 115(2.1)   |         |
| <b>Family income (monthly)</b>  |                   |            |         |
| <400.00 (\$)                    | 2794 (97.6)       | 69 (2.4)   | 0.256   |
| 400.00-800.00 (\$)              | 2177 (97.8)       | 49 (2.2)   |         |
| 801.00-1199.00 (\$)             | 1008 (98.1)       | 20 (1.9)   |         |
| 1200.00-1600.00 (\$)            | 452 (98.9)        | 5 (1.1)    |         |
| >1600.00 (\$)                   | 577 (98.6)        | 8 (1.4)    |         |
| <b>Marital status</b>           |                   |            |         |
| Unmarried/cohabitating partner  | 2910 (97.9)       | 62 (2.1)   | 0.465   |
| Singles                         | 2691 (98.2)       | 49 (1.8)   |         |
| Married                         | 2305 (98.2)       | 43 (1.8)   |         |
| Widows or divorced              | 371 (97.1)        | 11 (2.9)   |         |
| <b>Consumption of alcohol**</b> |                   |            |         |
| No                              | 6003 (98.3)       | 103 (1.7)  | 0.004   |

|                                     |             |           |        |
|-------------------------------------|-------------|-----------|--------|
| Yes                                 | 2274 (97.4) | 62 (2.6)  |        |
| <b>Consumption of drugs**</b>       |             |           |        |
| No                                  | 8078 (98.2) | 150 (1.8) | <0.001 |
| Yes                                 | 199 (93.0)  | 15 (7.0)  |        |
| <b>Antecedent of mental illness</b> |             |           |        |
| No                                  | 7713 (98.3) | 132 (1.7) | <0.001 |
| Yes                                 | 564 (94.5)  | 33 (5.5)  |        |
| <b>Depression ***</b>               |             |           |        |
| None                                | 6061 (98.6) | 85 (1.4)  | <0.001 |
| Mild                                | 1751 (97.1) | 53 (2.9)  |        |
| Moderate                            | 322(95.3)   | 16 (4.7)  |        |
| Severe                              | 92 (94.9)   | 5 (5.1)   |        |
| Highly severe                       | 51 (89.5)   | 6 (10.5)  |        |

168 \*Quantitative variable (median and interquartile ranges are shown). \*\*Household  
 169 consumption in the last six months. \*\*\*Measured with Hamilton's test. P values were  
 170 obtained with Wilcoxon test (age) and chi-square.

171

172 Family income (p=0.031), home consumption of alcohol (p<0.001) or drugs  
 173 (p<0.001), history of mental illness (p<0.001) and depression (p<0.001) were associated  
 174 with verbal violence at home. Table 4

175

176 **Table 4. Domiciliary sexual violence associated with socio-pathological variables in the**  
 177 **last half year of the pandemic in Honduras, n=8442.**

| Variables                      | Sexual violence |            | P value |
|--------------------------------|-----------------|------------|---------|
|                                | No n (%)        | Si n (%)   |         |
| <b>Age</b>                     | 35 (26-49)      | 36 (29-47) | 0.808   |
| <b>Gender</b>                  |                 |            |         |
| Male                           | 2985 (98.9)     | 33 (1.1)   | 0.144   |
| Female                         | 5344 (98.5)     | 80 (1.5)   |         |
| <b>Family income (monthly)</b> |                 |            |         |
| <400.00 (\$)                   | 2810 (98.2)     | 53 (1.8)   | 0.031   |



|                                     |             |           |        |
|-------------------------------------|-------------|-----------|--------|
| 400.00-800.00 (\$)                  | 2200 (98.8) | 26 (1.2)  |        |
| 801.00-1199.00 (\$)                 | 1017 (98.9) | 11 (1.1)  |        |
| 1200.00-1600.00 (\$)                | 456 (99.8)  | 1 (0.2)   |        |
| >1600.00 (\$)                       | 576 (98.5)  | 9 (1.5)   |        |
| <b>Marital status</b>               |             |           |        |
| Unmarried/cohabitating partner      | 2927 (98.5) | 45 (1.5)  | 0.554  |
| Singles                             | 2710 (98.9) | 30 (1.1)  |        |
| Married                             | 2316 (98.6) | 32 (1.4)  |        |
| Widows or divorced                  | 376 (98.4)  | 6 (1.6)   |        |
| <b>Consumption of alcohol**</b>     |             |           |        |
| No                                  | 6042 (99.0) | 64 (1.0)  | <0.001 |
| Yes                                 | 2287 (97.9) | 49 (2.1)  |        |
| <b>Consumption of drugs**</b>       |             |           |        |
| No                                  | 8124 (98.7) | 104 (1.3) | <0.001 |
| Yes                                 | 205 (95.8)  | 9 (4.2)   |        |
| <b>Antecedent of mental illness</b> |             |           |        |
| No                                  | 7760 (98.9) | 85 (1.1)  | <0.001 |
| Yes                                 | 569 (95.3)  | 28 (4.7)  |        |
| <b>Depression***</b>                |             |           |        |
| None                                | 6098 (99.2) | 48 (0.8)  | <0.001 |
| Mild                                | 1753 (97.2) | 51 (2.8)  |        |
| Moderate                            | 328 (97.0)  | 10 (3.0)  |        |
| Severe                              | 95 (97.9)   | 2 (2.1)   |        |
| Highly severe                       | 55 (96.5)   | 2 (3.5)   |        |

178 \*Quantitative variable (median and interquartile ranges are shown). \*\*Household  
 179 consumption in the last six months. \*\*\*Measured with Hamilton's test. P values were  
 180 obtained with Wilcoxon test (age) and chi-square.

181

182 In the multivariate analysis, it was found that women (PRa: 1.92; 95%CI: 1.33-  
 183 2.77; p-value=0.001), those with a history of alcohol (PRa: 1.77; 95%CI: 1.24-2.52; p-  
 184 value=0.002) or drug use (PRa: 2.08; 95%CI: 1.15-3.75; p-value=0.015), previous

185 mental illness (PRa: 2.94; 95%CI: 2.00-4.31; p-value<0.001), mild (RPa: 2.48; 95%CI:  
 186 1.75-3.53; p-value<0.001), moderate (RPa: 3.24; 95%CI: 1.85-5.70; p-value<0.001) or  
 187 severe depression (RPa: 3.11; 95%CI: 1.15-8.39; p-value=0.025); on the contrary, there  
 188 was less perception of domestic violence at higher economic income (all p-values were  
 189 <0.029), among single (p=0.003) and married (p<0.001). **Table 5**

190 **Factors associated with suffering domestic violence in women during the last**  
 191 **semester of the pandemic in Honduras- Central America**

192

193 **Table 5. Bivariate and multivariate analysis of factors associated domestic violence in**  
 194 **women during the last semester of the pandemic in Honduras, n=8442.**

| Variable                            | Bivariate analysis        | Multivariate analysis          |
|-------------------------------------|---------------------------|--------------------------------|
| <b>Age*</b>                         | 0.998 (0.988-1.008) 0.685 | Not entered in the final model |
| <b>Gender female</b>                | 1.68 (1.20-2.36) 0.003    | 1.92 (1.33-2.77) 0.001         |
| <b>Family income (monthly)</b>      |                           |                                |
| <400.00 (\$)                        | Comparison category       | Comparison category            |
| 400.00-800.00 (\$)                  | 0.63 (0.44-0.90) 0.012    | 0.65 (0.45-0.93) 0.018         |
| 801.00-1199.00 (\$)                 | 0.39 (0.21-0.71) 0.002    | 0.40 (0.21-0.75) 0.004         |
| 1200.00-1600.00 (\$)                | 0.36 (0.15-0.89) 0.027    | 0.36 (0.14-0.89) 0.028         |
| >1600.00 (\$)                       | 0.34 (0.15-0.78) 0.010    | 0.30 (0.13-0.68) 0.004         |
| <b>Marital status</b>               |                           |                                |
| Unmarried/cohabitating partner      | Comparison category       | Comparison category            |
| Singles                             | 0.51 (0.36-0.72) <0.001   | 0.56 (0.38-0.82) 0.003         |
| Married                             | 0.37 (0.24-0.56) <0.001   | 0.43 (0.27-0.68) <0.001        |
| Widows or divorced                  | 0.65 (0.32-1.32) 0.234    | 0.56 (0.25-1.26) 0.160         |
| <b>Consumption of alcohol**</b>     | 1.52 (1.12-2.05) 0.007    | 1.77 (1.24-2.52) 0.002         |
| <b>Consumption of drugs**</b>       | 3.05 (1.76-5.27) <0.001   | 2.08 (1.15-3.75) 0.015         |
| <b>Antecedent of mental illness</b> | 3.71 (2.63-5.25) <0.001   | 2.94 (2.00-4.31) <0.001        |
| <b>Depression***</b>                |                           |                                |
| None                                | Comparison category       | Comparison category            |
| Mild                                | 2.92 (2.14-3.98) <0.001   | 2.48 (1.75-3.53) <0.001        |
| Moderate                            | 3.03 (1.73-5.28) <0.001   | 3.24 (1.85-5.70) <0.001        |

|               |                         |                        |
|---------------|-------------------------|------------------------|
| Severe        | 3.77 (1.56-9.09) 0.003  | 3.11 (1.15-8.39) 0.025 |
| Highly severe | 2.57 (0.65-10.18) 0.180 | 1.40 (0.22-8.70) 0.721 |

195 \*Quantitative variable. \*\*Household consumption in the last six months. \*\*\*Measured  
196 with Hamilton's test. Prevalence ratios are shown to the left of the parentheses, 95%  
197 confidence intervals within the parentheses and p-values to the right (all obtained with  
198 generalized linear models: Poisson family, log link function and models adjusted for  
199 robust variances).

200

## 201 **DISCUSSION**

202 The objective of this study was to determine the factors associated with suffering  
203 domestic violence in women during the pandemic in Honduras, since, Honduras does  
204 not have updated national studies, the 2017 Chavarria-Mejia study was conducted in  
205 two communities in Honduras, where they found that 79% of the 153 women over 16  
206 years of age with a partner, had some type of domestic violence and 40% presented  
207 economic violence [10].

208 In another study on domestic violence in women in five communities in  
209 Honduras, the overall prevalence was 45% (737), the main type of violence was verbal  
210 52% (383), but psychological violence was also important, 4% (31), sexual violence  
211 19% (140) and physical violence 21% (151), predominantly in women between 20-39  
212 years of age [11].

213 The 2019 ENDESA reported among women aged 15-49 years that 16% have  
214 experienced some type of violence (psychological, physical or sexual) by a  
215 husband/partner, 15% have suffered psychological violence, 6%, physical violence and  
216 2% sexual violence [8]. This is aggravated by the report that practically once a day a  
217 woman dies in this country [9].

218 As can be seen in the three previous studies, the report of violence has been  
219 obtained in different populations in Honduras, but above all among women and prior to  
220 the COVID-19 pandemic, therefore, this was obtained in a population that attends  
221 health facilities, which are generally those who have more access to health care and  
222 have other underlying diseases. In addition, the results we present are important to be  
223 able to have a current statistic and that is given after one of the most important events  
224 for public health in recent decades [13].

225 The latter being very important because during the confinement that generated  
226 COVID-19, domestic violence increased due to the continuous contact between  
227 perpetrators and victims; an increase in cases has been reported in North America,  
228 Europe, Asia, the Pacific and Africa, especially during the first week of the blockade in  
229 each country [14]. A systematic review showed an increase in domestic violence  
230 following lockdowns [15].

231

232 As a first important result, less than 5% of the respondents perceived some type  
233 of violence. These results are similar to those described in Germany, where an online  
234 survey of 3545 volunteers reported that 5% of all participants (5.1% of all women and  
235 4.1% of all men) reported having experienced interpersonal violence (IPV), verbal (98%  
236 of all women and 100% of all men who experienced IPV), physical (38.4% of all  
237 women and 63.6% of all men who experienced IPV), or sexual (26.5% of all women  
238 and 50% of all men who experienced IPV) [16]. This is relevant because of the large  
239 number of people affected globally, as calculated in the United States of America, and it  
240 affects the victim, families, co-workers and the community, causes a decrease in  
241 psychological and physical health, a decrease in quality of life and a decrease in  
242 productivity [17]. Therefore, these results should be considered exploratory, since the  
243 objective was not to extrapolate the data to the entire Honduran population, but they are  
244 important because they were taken from a large population in the most important  
245 departments of the country and at a time when the pandemic was still present among the  
246 respondents.

247 Another important result was that women had a higher frequency of perceived  
248 domestic violence. Knowing that there are global reports indicating that an estimated  
249 243 million women and adolescents aged 15-49 years have been victims of physical  
250 and/or sexual violence at the hands of an intimate partner [18]. A study conducted in  
251 2020 in the United States reported that the prevalence of domestic violence during the  
252 COVID-19 pandemic was 18%; and that changes in income and employment increased  
253 the incidence of domestic violence by 1.63 times [19]. In another study, also from 2020  
254 in the USA, it was reported that the incidence of physical domestic violence against  
255 women was 1.8 times higher than before [20].

256 This is in addition to other important results that have been reported in other  
257 realities, such as in Peru in 2020 where a 48% increase in the number of calls made to  
258 the Domestic Violence Control and Assistance Unit was reported [21]. A meta-analysis  
259 showing an increase in psychological/emotional as well as verbal violence in the  
260 general population during the COVID-19 pandemic [22]. The World Vision report on  
261 domestic violence hotline calls during the outbreak of the COVID-19 pandemic shows  
262 that there was an increase in domestic violence cases worldwide; more specifically, in  
263 Argentina (25%), Bosnia and Herzegovina (22%), Brazil (18%), Chile (75%), Cyprus  
264 (47%), France (30%), India (32%); Lebanon (50%), Mexico (25%), Montenegro (27%),  
265 Singapore (33%), Spain (12%) and in the United States (22%); which were mainly  
266 related to intimate partner violence [23].

267 In South Africa, it was found that the fear and stress associated with pandemics  
268 can exacerbate intimate partner violence through control, manipulation and coercion  
269 tactics, as well as confinement measures that give abusers greater freedom to act  
270 without inspection or consequences [24]. Latin America and the Caribbean experienced  
271 increases in unemployment, poverty, food insecurity, etc. [25]. The prevalence of  
272 mental health symptoms during the COVID-19 crisis in Latin America reported that  
273 anxiety levels were significantly higher than in other regions, such as China (25%;  $p <$

274 0.001) [26]. There was also an increase in reported cases of domestic violence,  
275 particularly toward child abuse and intimate partner violence against women [27].  
276 Exacerbating the high rates of violence in the region, which were reported to be three  
277 times the global average before the pandemic [28]. And at the national level, Honduras  
278 lives in a normalized environment of violence, from the political violence that the  
279 country suffers, which is also influenced by living in a conservative environment and  
280 finding 60% of low educational level and 8% with no education; where it can be  
281 assumed that violence may not be identified or women are not allowed to talk about it  
282 [29]. All these cases give us a picture of how we can be in an environment that  
283 generates greater abuse for women and other vulnerable populations, which should be  
284 evaluated with greater emphasis in future research.

285 We also found that the higher the level of family income, the less domestic  
286 violence there was. Kebede et al. analyzed Demographic and Health Survey data from  
287 187716 women with partners aged 10-59 years from 20 low-and middle-income  
288 countries; where the findings suggest that the relationship between wealth and violence  
289 varies considerably in low- and middle-income countries [30]. This is in addition to the  
290 fact that the economic and labor crisis created by the pandemic could increase global  
291 unemployment by almost 25 million, according to a new assessment by the  
292 International Labor Organization (ILO) [31]. On the other hand, during the time of  
293 confinement, an increasing number of poor families do not have a source of daily  
294 income, which generates frustration and feelings of helplessness, all of which creates  
295 conditions for increased violence [32].

296 This is reinforced by the finding that a structured questionnaire on intimate  
297 partner violence found that wealthier and more empowered women reported less  
298 intimate partner violence, and that younger women and those living in rural areas  
299 tended to be more exposed to intimate partner violence [33]. That, if added to the other  
300 factors that were generated by movement restrictions, increases in child abuse, internet  
301 addiction, domestic violence and divorce consultations, as well as suicide rates [34]. All  
302 of this together tells us of a large social component that is closely linked to the whole  
303 picture of violence, which should be addressed in more detail by sociologists,  
304 psychologists, and other professionals.

305 We also found in this study that the consumption of alcohol or drugs in the home  
306 was associated with a higher frequency of domestic violence, it should be noted that the  
307 relationship between the consumption of alcohol and psychoactive substances with  
308 domestic violence is already well established [35, 36]. Having found clear evidence of a  
309 temporal association between episodes of alcohol consumption and subsequent episodes  
310 of occurrence of verbal and physical aggression [37]. In addition, the acceptance of  
311 alcohol consumption by men normalizes consumption and amplifies other behaviors  
312 tolerated in macho cultures, such as the use of violence [38]. This may also be due to  
313 the accumulation of stressful events, which, in the context of the current pandemic was  
314 precipitated by isolation, which favored the intensification of alcohol consumption  
315 within the family environment [39]. A systematic review reported that frequent alcohol

316 consumption by men increased the risk of perpetration of violence [40]. Another meta-  
317 analysis showed that people at risk for domestic violence and substance abuse are  
318 chronically exposed to elevated levels of anxiety, highly stressful environments, and  
319 unfavorable economic situations [41]. Because of all this evidence, it is important to  
320 screen families who may have alcohol, drug, or other problems that are closely related  
321 to domestic violence.

322 Our results reported that less domestic violence was found among single and  
323 married people. This is important to analyze within Honduran society, which, like other  
324 Latin American countries, has an important male chauvinist component, where gender  
325 roles influence individual behavior and relationships, due to the power and control that  
326 men try to impose on the entire family [42]. Therefore, what was reported is important  
327 as a starting point to determine the role that men, women and other members of the  
328 household play in the violence that may be perceived.

329 Yuan K, reported that women showed a higher prevalence of depression, anxiety  
330 and insomnia, women younger than 40 years or in the upper income level had a lower  
331 prevalence of depression and anxiety [43]. Having a history of mental illness was also  
332 associated with a higher frequency of domestic violence. COVID-19 may have a  
333 substantial impact on mental health and well-being. Jung et al showed that 25% of  
334 participants reported pre-existing mental health problems and showed more depression  
335 and anxiety, less well-being, less sense of coherence, and worse coping skills in terms  
336 of the pandemic and actions taken [16]. Thus, intimate partner violence against women  
337 is frequently and strongly associated with mental health problems [44]. Vai reported  
338 that female sex, having a prior psychiatric diagnosis, and psychopathology at 1-month  
339 follow-up were moderators of depression in the post-COVID-19 syndrome [45].

340 Finally, depression was associated with women suffering from domestic  
341 violence, Robinson 2022 reported that there was a small increase in mental health  
342 symptoms shortly after the outbreak of the COVID-19 pandemic in symptoms of  
343 depression and mood disorders, which tended to be higher and remained significantly  
344 elevated in May-July [46]. A systematic review found that suggested risk factors for  
345 violence against women and girls after disasters include increased life stressors, law  
346 enforcement failure, exposure to high-risk environments, exacerbation of existing  
347 gender inequalities, and unequal social norms [47]. Which is increased when there is  
348 domestic conflict and violence, financial loss, anxiety and depression, and pre-existing  
349 mental health conditions, all of which should be considered to prevent suicide attempts  
350 and deaths secondary to the COVID-19 pandemic [48].

### 351 **Limitations**

352 The main limitation was selection bias, since the data obtained cannot be  
353 extrapolated to the entire Honduran population; however, by obtaining good statistical  
354 power, the associations and results can be used to generate important conclusions that  
355 can be used for the elaboration of research that aims to have more associated variables,  
356 with a larger sample size and representativeness, as well as with more advanced

357 designs. In addition, there could have been a possible bias because some may have  
358 hidden or changed their answers out of fear or embarrassment; however, it is believed  
359 that, if it occurred, it was minimal, since the anonymous nature of the survey helped  
360 them to have the confidence to answer truthfully.

361



362 **Conclusions:**

363

364 From all the findings it is concluded that women had a higher frequency of  
365 domestic violence, the consumption of alcohol or drugs in the home, having a history of  
366 mental illnesses such as depression, likewise, there was less frequency of domestic  
367 violence according to a higher economic income in the home, between single and  
368 married people.

369 The inequality of opportunities, the responsibility of Honduran households that  
370 falls on women as heads of household, extreme poverty, and low schooling make  
371 women more vulnerable to domestic violence. Therefore, it is important to continue  
372 with this line of research in order to have real data at the national level and make  
373 decisions to address this problem.

374 **Author Contributions:** Study design: CM, EET, LIZ, and CASM Data collection: CM,  
375 HNCR Data analysis: CM, DAC Writing: CM, EET, LIZ, CASM, DAC, and HNCR, all  
376 authors have read and agreed to the published version of the manuscript.

377 **Funding:** The current article processing charges (publication fees) were funded by the  
378 Facultad de Ciencias Médicas (FCM) (2-03-01-01), Universidad Nacional Autónoma de  
379 Honduras (UNAH), Tegucigalpa, MDC, Honduras, Central America (granted to Dra.  
380 Espinoza).

381 **Institutional Review Board Statement:** The study was conducted under the  
382 Declaration of Helsinki. This research's preparation and execution fully complied with  
383 the fundamental ethical principles of autonomy, justice, beneficence, and non-  
384 maleficence. The Act Number (2019062), approved by the Ethics Committee in  
385 Biomedical Research (CEIB) of the National Autonomous University of Honduras  
386 (UNAH), meeting of December 02, 2021.

387 **Data Availability Statement:** The data presented in this study are available on request  
388 from the corresponding author.

389 **Acknowledgments:** To all MSS of the cohort who agreed to participate in the project,  
390 from September to March 2021-2022 and from October-April 2021-2022, to Mr.  
391 Mauricio Gonzales for the elaboration of the database and a first filtering of the  
392 database.

393 **Conflicts of Interest:** The authors declare no conflict of interest.

394 **References**

- 395 1. Organización de las Naciones Unidas. ¿Qué es el abuso doméstico? consultado 20  
396 de diciembre 2022. <https://www.un.org/en/coronavirus/what-is-domestic-abuse>.
- 397 2. WHO. Violence Against Women Prevalence Estimates, 2018. 2021.  
398 [https://apps.who.int/iris/bitstream/handle/10665/341337/9789240022256-](https://apps.who.int/iris/bitstream/handle/10665/341337/9789240022256-eng.pdf?sequence=1)  
399 [eng.pdf?sequence=1](https://apps.who.int/iris/bitstream/handle/10665/341337/9789240022256-eng.pdf?sequence=1).
- 400 3. El periódico. Las llamadas de víctimas del machismo suben el 20%. 2020  
401 consultado 22 diciembre 2022.



- 402 <https://www.elperiodico.com/es/sociedad/20200325/violencia-machista-aumento->  
403 [coronavirus-7902723.](https://www.elperiodico.com/es/sociedad/20200325/violencia-machista-aumento-)
- 404 4. Kelly J MT. Coronavirus: Domestic abuse calls up 25% since lockdown, charity  
405 says. 6 abril 2020 consultado 22 de diciembre 2022. [https://www.bbc.com/news/uk-](https://www.bbc.com/news/uk-52157620)  
406 [52157620.](https://www.bbc.com/news/uk-52157620)
- 407 5. Radio France Internationale (RFI). Covid-19: Women trapped between a deadly  
408 virus and a deadly partner. 6 april 2020 consultado 22 de december 2022. Covid-19:  
409 Women trapped between a deadly virus and a deadly partner.
- 410 6. Allen-Ebrahimian B. China's domestic violence epidemic. 2020; consultado 22  
411 december 2022. [https://www.axios.com/2020/03/07/china-domestic-violence-](https://www.axios.com/2020/03/07/china-domestic-violence-coronavirus-quarantine)  
412 [coronavirus-quarantine.](https://www.axios.com/2020/03/07/china-domestic-violence-coronavirus-quarantine)
- 413 7. UN Women. The Shadow Pandemic: Violence against women during COVID-19.  
414 consultado 22 de diciembre 2022. [https://www.unwomen.org/es/news/in-focus/in-](https://www.unwomen.org/es/news/in-focus/in-focus-gender-equality-in-covid-19-response/violence-against-women-during-covid-19)  
415 [focus-gender-equality-in-covid-19-response/violence-against-women-during-covid-](https://www.unwomen.org/es/news/in-focus/in-focus-gender-equality-in-covid-19-response/violence-against-women-during-covid-19)  
416 [19.](https://www.unwomen.org/es/news/in-focus/in-focus-gender-equality-in-covid-19-response/violence-against-women-during-covid-19)
- 417 8. Instituto Nacional de Estadísticas (INE). ENCUESTA NACIONAL DE  
418 DEMOGRAFÍA Y SALUD / ENCUESTA DE INDICADORES MÚLTIPLES  
419 POR CONGLOMERADOS (ENDESA/MICS 2019). 2019 consultado diciembre  
420 2022. [https://www.ine.gov.hk/V3/imag-doc/2021/10/Informe-ENDESA-MICS-](https://www.ine.gov.hk/V3/imag-doc/2021/10/Informe-ENDESA-MICS-2019.pdf)  
421 [2019.pdf.](https://www.ine.gov.hk/V3/imag-doc/2021/10/Informe-ENDESA-MICS-2019.pdf)
- 422 9. UNAH-ONV-IUDPAS. MUERTE VIOLENTA de mujeres y femicidios en  
423 Honduras [Boletín Infográfico]. Tegucigalpa, Honduras: Universidad Nacional  
424 Autónoma de Honduras; Nov 25, 2022.
- 425 10. Chavarria-Mejia J, Calix-Pineda D, Vasquez-Bonilla WO. CARACTERIZACIÓN  
426 DE VIOLENCIA DOMÉSTICA EN MUJERES MAYORES DE 16 AÑOS CON  
427 COMPAÑERO EN COMUNIDAD DE HONDURAS 2016. CIMEL 2017.  
428 doi:10.23961/cimel.v22i1.740.
- 429 11. Zavala GL, Montoya-Reales DA. Violencia contra la mujer en la relación de pareja;  
430 caracterización en cinco comunidades de Honduras. Rev. fac. cienc. méd. (Impr.).  
431 2017:16–27.
- 432 12. Espinoza-Turcios E, Gonzales-Romero RM, Sosa-Mendoza C, Sierra-Santos M,  
433 Castro-Ramos HN, Zambrano LI, et al. Factors associated with hopelessness,  
434 depression and anxiety in the Honduran-Central America population during the  
435 COVID-19 pandemic. Front. Psychiatry. 2023;14:1116881.  
436 doi:10.3389/fpsyt.2023.1116881.
- 437 13. Arora T, Grey I, Östlundh L, Lam KBH, Omar OM, Arnone D. The prevalence of  
438 psychological consequences of COVID-19: A systematic review and meta-analysis  
439 of observational studies. J Health Psychol. 2022;27:805–24.  
440 doi:10.1177/1359105320966639.
- 441 14. Kourti A, Stavridou A, Panagouli E, Psaltopoulou T, Spiliopoulou C, Tsofia M, et  
442 al. Domestic Violence During the COVID-19 Pandemic: A Systematic Review.  
443 Trauma Violence Abuse. 2021:15248380211038690.  
444 doi:10.1177/15248380211038690.
- 445 15. Piquero AR, Jennings WG, Jemison E, Kaukinen C, Knaul FM. Domestic violence  
446 during the COVID-19 pandemic - Evidence from a systematic review and meta-  
447 analysis. J Crim Justice. 2021;74:101806. doi:10.1016/j.jcrimjus.2021.101806.

- 448 16. Jung S, Kneer J, Krüger THC. Mental Health, Sense of Coherence, and  
449 Interpersonal Violence during the COVID-19 Pandemic Lockdown in Germany. *J*  
450 *Clin Med* 2020. doi:10.3390/jcm9113708.
- 451 17. Houseman B, Semien G. StatPearls: Florida Domestic Violence. Treasure Island  
452 (FL); 2022.
- 453 18. UN woman. COVID-19 and Ending Violence Against Women and Girls.  
454 consultado 20 de diciembre 2022.  
455 [https://www.unwomen.org/sites/default/files/Headquarters/Attachments/Sections/Li](https://www.unwomen.org/sites/default/files/Headquarters/Attachments/Sections/Library/Publications/2020/Issue-brief-COVID-19-and-ending-violence-against-women-and-girls-en.pdf)  
456 [brary/Publications/2020/Issue-brief-COVID-19-and-ending-violence-against-](https://www.unwomen.org/sites/default/files/Headquarters/Attachments/Sections/Library/Publications/2020/Issue-brief-COVID-19-and-ending-violence-against-women-and-girls-en.pdf)  
457 [women-and-girls-en.pdf](https://www.unwomen.org/sites/default/files/Headquarters/Attachments/Sections/Library/Publications/2020/Issue-brief-COVID-19-and-ending-violence-against-women-and-girls-en.pdf).
- 458 19. Jetelina KK, Knell G, Molsberry RJ. Changes in intimate partner violence during  
459 the early stages of the COVID-19 pandemic in the USA. *Inj Prev*. 2021;27:93–7.  
460 doi:10.1136/injuryprev-2020-043831.
- 461 20. Gosangi B, Park H, Thomas R, Gujrathi R, Bay CP, Raja AS, et al. Exacerbation of  
462 Physical Intimate Partner Violence during COVID-19 Pandemic. *Radiology*.  
463 2021;298:E38-E45. doi:10.1148/radiol.2020202866.
- 464 21. Agüero JM. COVID-19 and the rise of intimate partner violence. *World Dev*.  
465 2021;137:105217. doi:10.1016/j.worlddev.2020.105217.
- 466 22. Thiel F, Büechl VCS, Rehberg F, Mojahed A, Daniels JK, Schellong J, Garthus-  
467 Niegel S. Changes in Prevalence and Severity of Domestic Violence During the  
468 COVID-19 Pandemic: A Systematic Review. *Front Psychiatry*. 2022;13:874183.  
469 doi:10.3389/FPSYT.2022.874183.
- 470 23. World Vision. Repercusiones del COVID-19 UNA TORMENTA PERFECTA: MÁS  
471 MILLONES DE NIÑOS CORREN EL RIESGO DE SUFRIR VIOLENCIA  
472 DURANTE EL CONFINAMIENTO Y LA “NUEVA NORMALIDAD”. 2020.  
473 [https://www.wvi.org/sites/default/files/2020-06/COVID-19%20aftershocks\\_SP.pdf](https://www.wvi.org/sites/default/files/2020-06/COVID-19%20aftershocks_SP.pdf).
- 474 24. Bianca Dekel NA. ‘I will rather be killed by corona than by him...’: Experiences of  
475 abused women seeking shelter during South Africa’s COVID-19 lockdown. *Plos*  
476 *One*. 2021.
- 477 25. ECLAC. The recovery paradox in Latin America and the Caribbean Growth amid  
478 persisting structural problems: inequality, poverty and low investment and  
479 productivity. 2021. [https://www.cepal.org/en/publications/47059-recovery-paradox-](https://www.cepal.org/en/publications/47059-recovery-paradox-latin-america-and-caribbean-growth-amid-persisting-structural)  
480 [latin-america-and-caribbean-growth-amid-persisting-structural](https://www.cepal.org/en/publications/47059-recovery-paradox-latin-america-and-caribbean-growth-amid-persisting-structural).
- 481 26. Zhang SX, Batra K, Xu W, Liu T, Dong RK, Yin A, et al. Mental disorder  
482 symptoms during the COVID-19 pandemic in Latin America - a systematic review  
483 and meta-analysis. *Epidemiol Psychiatr Sci*. 2022;31:e23.  
484 doi:10.1017/S2045796021000767.
- 485 27. WHO. ADDRESSING VIOLENCE AGAINST CHILDREN, WOMEN AND  
486 OLDER PEOPLE DURING THE COVID-19 PANDEMIC: KEY ACTIONS. 2020.  
487 [https://apps.who.int/iris/bitstream/handle/10665/332458/WHO-2019-nCoV-](https://apps.who.int/iris/bitstream/handle/10665/332458/WHO-2019-nCoV-Violence_actions-2020.1-eng.pdf?sequence=1&isAllowed=y)  
488 [Violence\\_actions-2020.1-eng.pdf?sequence=1&isAllowed=y](https://apps.who.int/iris/bitstream/handle/10665/332458/WHO-2019-nCoV-Violence_actions-2020.1-eng.pdf?sequence=1&isAllowed=y).
- 489 28. PAHO. Violence in the Americas. What must be done? 2020.  
490 [https://www.paho.org/en/documents/infographic-violence-americas-what-must-be-](https://www.paho.org/en/documents/infographic-violence-americas-what-must-be-done)  
491 [done](https://www.paho.org/en/documents/infographic-violence-americas-what-must-be-done).
- 492 29. Valladares D, Martínez Linares R, Pérez Ramirez I, Moncada G. Prevalencia de  
493 trastornos mentales en relación con violencia, resiliencia y estrategias de

- 494       afrontamiento en Yoro, Choluteca y Cortés, junio, 2016. Portal de la Ciencia.  
495       2018:139–57. doi:10.5377/pc.v0i14.6645.
- 496   30. Kebede S, van Harmelen A-L, Roman-Urrestarazu A. Wealth Inequality and  
497       Intimate Partner Violence: An Individual and Ecological Level Analysis Across 20  
498       Countries. *J Interpers Violence*. 2022;37:NP15568-NP15593.  
499       doi:10.1177/08862605211016337.
- 500   31. International labour organization. Almost 25 million jobs could be lost worldwide  
501       as a result of COVID-19, says ILO. consultado 21 de diciembre 2022.  
502       [https://www.ilo.org/global/about-the-ilo/newsroom/news/WCMS\\_738742/lang--](https://www.ilo.org/global/about-the-ilo/newsroom/news/WCMS_738742/lang--en/index.htm)  
503       en/index.htm.
- 504   32. Singh S, Roy D, Sinha K, Parveen S, Sharma G, Joshi G. Impact of COVID-19 and  
505       lockdown on mental health of children and adolescents: A narrative review with  
506       recommendations. *Psychiatry Res*. 2020;293:113429.  
507       doi:10.1016/j.psychres.2020.113429.
- 508   33. Coll CVN, Ewerling F, García-Moreno C, Hellwig F, Barros AJD. Intimate partner  
509       violence in 46 low-income and middle-income countries: an appraisal of the most  
510       vulnerable groups of women using national health surveys. *BMJ Glob Health*.  
511       2020;5:e002208. doi:10.1136/bmjgh-2019-002208.
- 512   34. Saeko Kamoshida, Naoto Nihonmatsu, Koubun Wakashima. The relationship  
513       between family variables and family social problems during the COVID-19  
514       pandemic. *Plos One*. 2022.
- 515   35. Fonseca AM, Galduróz JCF, Tondowski CS, Noto AR. Alcohol-related domestic  
516       violence: a household survey in Brazil. *Rev Saude Publica*. 2009;43:743–9.  
517       doi:10.1590/s0034-89102009005000049.
- 518   36. A violência doméstica a partir do discurso de mulheres agredidas; 2013.
- 519   37. Testa M, Derrick JL. A daily process examination of the temporal association  
520       between alcohol use and verbal and physical aggression in community couples.  
521       *Psychol Addict Behav*. 2014;28:127–38. doi:10.1037/a0032988.
- 522   38. Bonnevie E, Kigozi G, Kairania R, Ssemanda JB, Nakyanjo N, Ddaaki WG, et al.  
523       Alcohol use in fishing communities and men's willingness to participate in an  
524       alcohol, violence and HIV risk reduction intervention: qualitative findings from  
525       Rakai, Uganda. *Cult Health Sex*. 2020;22:275–91.  
526       doi:10.1080/13691058.2019.1587002.
- 527   39. Campbell AM. An increasing risk of family violence during the Covid-19  
528       pandemic: Strengthening community collaborations to save lives. *Forensic Science*  
529       *International: Reports*. 2020;2:100089. doi:10.1016/j.fsir.2020.100089.
- 530   40. Wright MMM, Kankkunen PM, Jokiniemi KS. Prevention interventions for  
531       interpersonal violence occurring under the influence of alcohol: A mixed method  
532       systematic review. *J Adv Nurs* 2022. doi:10.1111/jan.15335.
- 533   41. Abdo C, Miranda EP, Santos CS, Júnior JdB, Bernardo WM. Domestic violence  
534       and substance abuse during COVID19: A systematic review. *Indian J Psychiatry*.  
535       2020;62:S337-S342. doi:10.4103/psychiatry.IndianJPsychiatry\_1049\_20.
- 536   42. Mancera BM, Dorgo S, Provencio-Vasquez E. Risk Factors for Hispanic Male  
537       Intimate Partner Violence Perpetration. *Am J Mens Health*. 2017;11:969–83.  
538       doi:10.1177/1557988315579196.
- 539   43. Yuan K, Zheng Y-B, Wang Y-J, Sun Y-K, Gong Y-M, Huang Y-T, et al. A  
540       systematic review and meta-analysis on prevalence of and risk factors associated

- 541 with depression, anxiety and insomnia in infectious diseases, including COVID-19:  
542 a call to action. *Mol Psychiatry*. 2022;27:3214–22. doi:10.1038/s41380-022-01638-  
543 z.
- 544 44. Hameed M, O'Doherty L, Gilchrist G, Tirado-Muñoz J, Taft A, Chondros P, et al.  
545 Psychological therapies for women who experience intimate partner violence.  
546 *Cochrane Database Syst Rev*. 2020;7:CD013017.  
547 doi:10.1002/14651858.CD013017.pub2.
- 548 45. Vai B, Mazza MG, Delli Colli C, Foiselle M, Allen B, Benedetti F, et al. Mental  
549 disorders and risk of COVID-19-related mortality, hospitalisation, and intensive  
550 care unit admission: a systematic review and meta-analysis. *Lancet Psychiatry*.  
551 2021;8:797–812. doi:10.1016/S2215-0366(21)00232-7.
- 552 46. Robinson E, Sutin AR, Daly M, Jones A. A systematic review and meta-analysis of  
553 longitudinal cohort studies comparing mental health before versus during the  
554 COVID-19 pandemic in 2020. *J Affect Disord*. 2022;296:567–76.  
555 doi:10.1016/j.jad.2021.09.098.
- 556 47. Thurston AM, Stöckl H, Ranganathan M. Natural hazards, disasters and violence  
557 against women and girls: a global mixed-methods systematic review. *BMJ Glob  
558 Health* 2021. doi:10.1136/bmjgh-2020-004377.
- 559 48. Pathirathna ML, Nandasena HMRKG, Atapattu AMMP, Weerasekara I. Impact of  
560 the COVID-19 pandemic on suicidal attempts and death rates: a systematic review.  
561 *BMC Psychiatry*. 2022;22:506. doi:10.1186/s12888-022-04158-w.
